# Supplementary material
Source: publisher figshare collection journal article supplement (https://acs.figshare.com/ndownloader/files/7381513)
Supplement: Supplementary file 1 [file 7381513]

## Support information

### Electrooxidation of Methanol on Pt @Ni Bimetallic Catalyst

#### Supported on Porous Carbon Nanofibers

JianYi Chen<sup>a,b</sup>, QiJian Niu<sup>b</sup>, GuangKai Chen<sup>b</sup>, Jun Nie<sup>\*b</sup>, GuiPing Ma<sup>\*b</sup>

a School of Material Science and Engineering, Changzhou University, Changzhou, Jiangsu 213164, P.R. China.

b Key Laboratory of Carbon Fiber and Functional Polymers, Ministry of Education, Beijing University of Chemical Technology, Beijing, 100029, P. R. China.

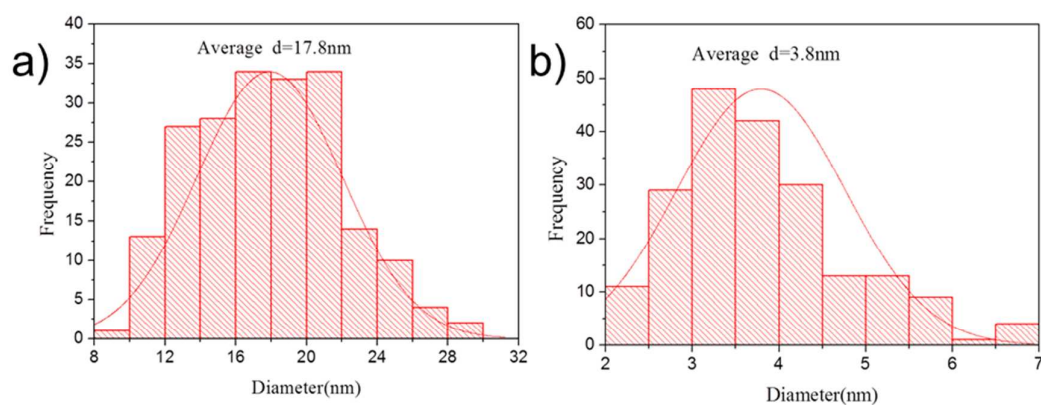

**Figure S1.** (a) The diameter distributions of Ni nanoparticles deposited on the CNFs.  
(b) The diameter distributions of Pt nanoparticles deposited on the Ni<sub>50</sub>/CNFs.

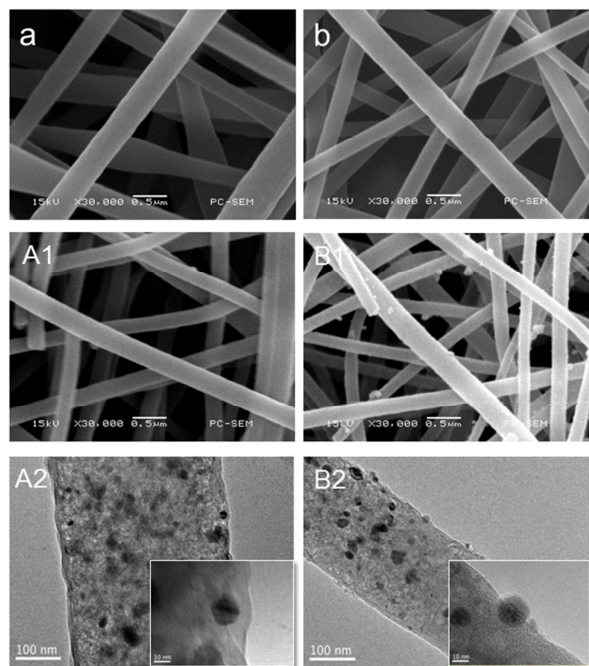

**Figure S2.** SEM images for the NiAA/PAN nanofibers mats before and after carbonization. (a) NiAA<sub>10</sub>/PAN nanofibers, (b) NiAA<sub>30</sub>/PAN nanofibers; (A1) Ni<sub>10</sub>/CNFs, (B1) Ni<sub>30</sub>/CNFs. TEM images for the NiAA/PAN nanofibers mats after carbonization. (A2) Ni<sub>10</sub>/CNFs and (B2) Ni<sub>30</sub>/CNFs. The insets are high-magnification images of the nanofibers.

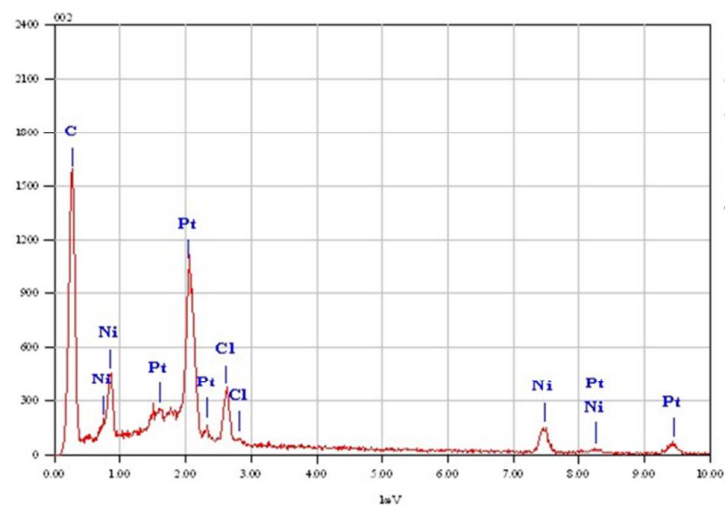

**Figure S3.** EDS spectra of Ni<sub>50</sub>/Pt/CNFs.

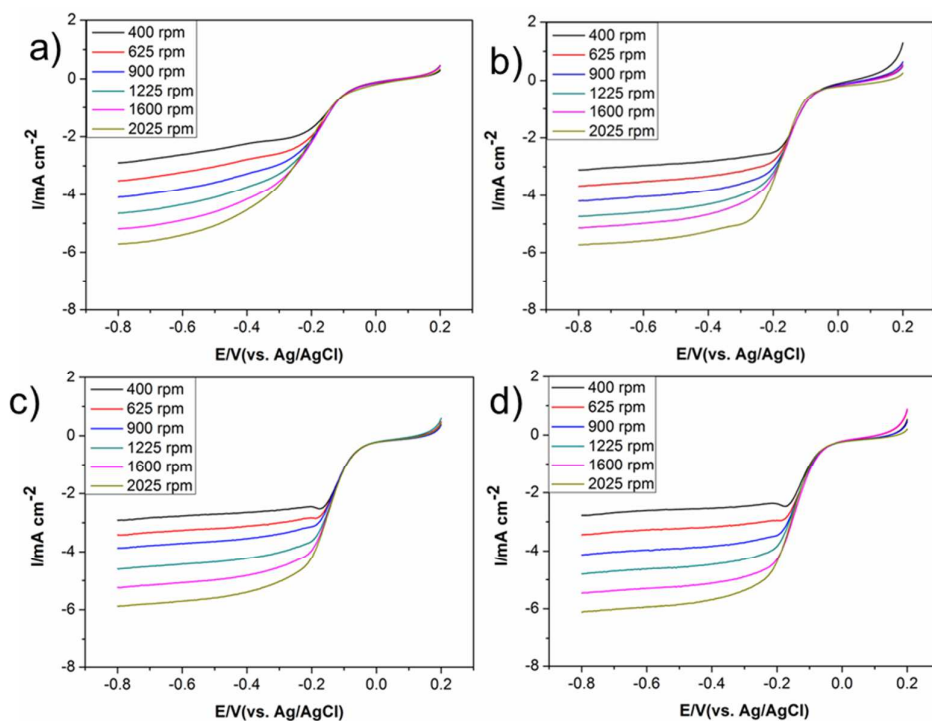

**Figure S4.** LSV curves of (a) Pt/CNFs, (b) Ni<sub>10</sub>/Pt/CNFs, (c) Ni<sub>30</sub>/Pt/CNFs and (d) Ni<sub>50</sub>/Pt/CNFs obtained at different rotation rates.
